# Supplementary material
Source: MDPI journal article supplement (https://www.mdpi.com/2073-4352/2/3/1084)
Supplement: s1 [file s1]

 
data_sh22x 
 
_audit_creation_method            SHELXL-97 
_chemical_name_systematic 
; 
 ? 
; 
_chemical_name_common             ? 
_chemical_melting_point           ? 
_chemical_formula_moiety    'C32 H14 Dy K N4 O24, 2(C10 H9 N2), 5(H2 O)' 
_chemical_formula_sum             'C52 H42 Dy K N8 O29' 
_chemical_formula_weight          1444.54 
 
loop_ 
 _atom_type_symbol 
 _atom_type_description 
 _atom_type_scat_dispersion_real 
 _atom_type_scat_dispersion_imag 
 _atom_type_scat_source 
 'C'  'C'   0.0033   0.0016 
 'International Tables Vol C Tables 4.2.6.8 and 6.1.1.4' 
 'H'  'H'   0.0000   0.0000 
 'International Tables Vol C Tables 4.2.6.8 and 6.1.1.4' 
 'Dy'  'Dy'  -0.1892   4.4098 
 'International Tables Vol C Tables 4.2.6.8 and 6.1.1.4' 
 'K'  'K'   0.2009   0.2494 
 'International Tables Vol C Tables 4.2.6.8 and 6.1.1.4' 
 'N'  'N'   0.0061   0.0033 
 'International Tables Vol C Tables 4.2.6.8 and 6.1.1.4' 
 'O'  'O'   0.0106   0.0060 
 'International Tables Vol C Tables 4.2.6.8 and 6.1.1.4' 
 
_symmetry_cell_setting            triclinic 
_symmetry_space_group_name_H-M    'P -1' 
_symmetry_space_group_name_Hall   '-P 1' 
 
loop_ 
 _symmetry_equiv_pos_as_xyz 
 'x, y, z' 
 '-x, -y, -z' 
 
_cell_length_a                    9.188(2) 
_cell_length_b                    15.7332(17) 
_cell_length_c                    19.1664(19) 
_cell_angle_alpha                 92.797(6) 
_cell_angle_beta                  92.319(7) 
_cell_angle_gamma                 91.273(9) 
_cell_volume                      2764.3(7) 
_cell_formula_units_Z             2 
_cell_measurement_temperature     296(2) 
_cell_measurement_reflns_used     9799 
_cell_measurement_theta_min       2.55 
_cell_measurement_theta_max       28.37
 
_exptl_crystal_description        block  
_exptl_crystal_colour             'pale pink' 
_exptl_crystal_size_max           0.30 
_exptl_crystal_size_mid           0.25 
_exptl_crystal_size_min           0.25 
_exptl_crystal_density_meas       ? 
_exptl_crystal_density_diffrn     1.736 
_exptl_crystal_density_method     'not measured' 
_exptl_crystal_F_000              1454 
_exptl_absorpt_coefficient_mu     1.532 
_exptl_absorpt_correction_type    multi-scan 
_exptl_absorpt_correction_T_min   0.657 
_exptl_absorpt_correction_T_max   0.701 
_exptl_absorpt_process_details    'SADABS '
 
_exptl_special_details 
; 
 ? 
; 
 
_diffrn_ambient_temperature       296(2) 
_diffrn_radiation_wavelength      0.71073 
_diffrn_radiation_type            MoK\a 
_diffrn_radiation_source          'fine-focus sealed tube' 
_diffrn_radiation_monochromator   graphite 
_diffrn_measurement_device_type   'Bruker APEX-II CCD'
_diffrn_measurement_method        'omega scan' 
_diffrn_detector_area_resol_mean  ? 
_diffrn_standards_number          ? 
_diffrn_standards_interval_count  ? 
_diffrn_standards_interval_time   ? 
_diffrn_standards_decay_%         0 
_diffrn_reflns_number             37880 
_diffrn_reflns_av_R_equivalents   0.0253 
_diffrn_reflns_av_sigmaI/netI     0.0314 
_diffrn_reflns_limit_h_min        -7 
_diffrn_reflns_limit_h_max        12 
_diffrn_reflns_limit_k_min        -20 
_diffrn_reflns_limit_k_max        20 
_diffrn_reflns_limit_l_min        -25 
_diffrn_reflns_limit_l_max        25 
_diffrn_reflns_theta_min          2.44 
_diffrn_reflns_theta_max          28.37 
_reflns_number_total              13445 
_reflns_number_gt                 12100 
_reflns_threshold_expression      I>2sigma(I) 
 
_computing_data_collection        ? 
_computing_cell_refinement        ? 
_computing_data_reduction         ? 
_computing_structure_solution     'SHELXS-97 (Sheldrick, 1990)' 
_computing_structure_refinement   'SHELXL-97 (Sheldrick, 1997)' 
_computing_molecular_graphics     ? 
_computing_publication_material   ? 
 
_refine_special_details 
; 
 Refinement of F^2^ against ALL reflections.  The weighted R-factor wR and 
 goodness of fit S are based on F^2^, conventional R-factors R are based 
 on F, with F set to zero for negative F^2^. The threshold expression of 
 F^2^ > 2sigma(F^2^) is used only for calculating R-factors(gt) etc. and is 
 not relevant to the choice of reflections for refinement.  R-factors based 
 on F^2^ are statistically about twice as large as those based on F, and R- 
 factors based on ALL data will be even larger. 
; 
 
_refine_ls_structure_factor_coef  Fsqd  
_refine_ls_matrix_type            full 
_refine_ls_weighting_scheme       calc  
_refine_ls_weighting_details 
 'calc w=1/[\s^2^(Fo^2^)+(0.0387P)^2^+3.7247P] where P=(Fo^2^+2Fc^2^)/3' 
_atom_sites_solution_primary      direct 
_atom_sites_solution_secondary    difmap 
_atom_sites_solution_hydrogens    'difmap and geom'
_refine_ls_hydrogen_treatment     constr 
_refine_ls_extinction_method      none 
_refine_ls_extinction_coef        ? 
_refine_ls_number_reflns          13445 
_refine_ls_number_parameters      825 
_refine_ls_number_restraints      0 
_refine_ls_R_factor_all           0.0354 
_refine_ls_R_factor_gt            0.0286 
_refine_ls_wR_factor_ref          0.0843 
_refine_ls_wR_factor_gt           0.0781 
_refine_ls_goodness_of_fit_ref    1.064 
_refine_ls_restrained_S_all       1.064 
_refine_ls_shift/su_max           0.003 
_refine_ls_shift/su_mean          0.000 
 
loop_ 
 _atom_site_label 
 _atom_site_type_symbol 
 _atom_site_fract_x 
 _atom_site_fract_y 
 _atom_site_fract_z 
 _atom_site_U_iso_or_equiv 
 _atom_site_adp_type 
 _atom_site_occupancy 
 _atom_site_symmetry_multiplicity 
 _atom_site_calc_flag 
 _atom_site_refinement_flags 
 _atom_site_disorder_assembly 
 _atom_site_disorder_group 
K1 K 0.26386(9) 0.64776(5) 0.23770(4) 0.04503(17) Uani 1 1 d . . . 
Dy1 Dy 0.270254(13) 0.390653(7) 0.729152(6) 0.02068(4) Uani 1 1 d . . . 
C1 C 0.3845(3) 0.52370(17) 0.61258(14) 0.0253(5) Uani 1 1 d . . . 
C2 C 0.3953(3) 0.56883(17) 0.55282(15) 0.0287(6) Uani 1 1 d . . . 
H2 H 0.4609 0.6145 0.5517 0.034 Uiso 1 1 calc R . . 
C3 C 0.3069(3) 0.54501(17) 0.49467(14) 0.0275(5) Uani 1 1 d . . . 
C4 C 0.2079(3) 0.47834(18) 0.49837(14) 0.0282(6) Uani 1 1 d . . . 
H4 H 0.1464 0.4616 0.4602 0.034 Uiso 1 1 calc R . . 
C5 C 0.2026(3) 0.43703(17) 0.56029(13) 0.0242(5) Uani 1 1 d . . . 
C6 C 0.4766(3) 0.54424(19) 0.67814(15) 0.0313(6) Uani 1 1 d . . . 
C7 C 0.3247(3) 0.58916(18) 0.42742(15) 0.0310(6) Uani 1 1 d . . . 
C8 C 0.0964(3) 0.36494(18) 0.57139(14) 0.0288(6) Uani 1 1 d . . . 
N1 N 0.2905(2) 0.45846(13) 0.61568(11) 0.0225(4) Uani 1 1 d . . . 
O1 O 0.4643(2) 0.49169(14) 0.72633(11) 0.0350(5) Uani 1 1 d . . . 
O2 O 0.5534(3) 0.60904(17) 0.68057(14) 0.0546(7) Uani 1 1 d . . . 
O3 O 0.4251(3) 0.64993(14) 0.43560(11) 0.0407(5) Uani 1 1 d . . . 
H3O H 0.4392 0.6658 0.3968 0.061 Uiso 1 1 d R . . 
O4 O 0.2577(3) 0.56907(17) 0.37412(12) 0.0474(6) Uani 1 1 d . . . 
O5 O 0.1044(2) 0.33707(12) 0.63361(10) 0.0291(4) Uani 1 1 d . . . 
O6 O 0.0133(3) 0.33875(18) 0.52407(13) 0.0548(7) Uani 1 1 d . . . 
C9 C 0.3295(3) 0.17681(16) 0.71013(13) 0.0211(5) Uani 1 1 d . . . 
C10 C 0.3155(3) 0.09006(16) 0.71742(14) 0.0238(5) Uani 1 1 d . . . 
H10 H 0.3727 0.0522 0.6925 0.029 Uiso 1 1 calc R . . 
C11 C 0.2140(3) 0.06080(16) 0.76286(13) 0.0229(5) Uani 1 1 d . . . 
C12 C 0.1312(3) 0.11925(16) 0.79956(13) 0.0236(5) Uani 1 1 d . . . 
H12 H 0.0657 0.1017 0.8320 0.028 Uiso 1 1 calc R . . 
C13 C 0.1492(3) 0.20427(16) 0.78629(13) 0.0216(5) Uani 1 1 d . . . 
C14 C 0.4405(3) 0.21645(16) 0.66504(13) 0.0227(5) Uani 1 1 d . . . 
C15 C 0.1854(3) -0.03165(17) 0.77361(16) 0.0290(6) Uani 1 1 d . . . 
C16 C 0.0575(3) 0.27287(16) 0.81813(14) 0.0238(5) Uani 1 1 d . . . 
N2 N 0.2454(2) 0.23237(13) 0.74269(11) 0.0208(4) Uani 1 1 d . . . 
O7 O 0.4479(2) 0.29799(12) 0.66998(10) 0.0279(4) Uani 1 1 d . . . 
O8 O 0.5153(2) 0.17067(13) 0.62832(11) 0.0357(5) Uani 1 1 d . . . 
O9 O 0.2638(3) -0.08160(14) 0.73518(15) 0.0511(7) Uani 1 1 d . . . 
H9O H 0.2403 -0.1388 0.7353 0.077 Uiso 1 1 d R . . 
O10 O 0.0968(3) -0.05524(14) 0.81330(13) 0.0433(6) Uani 1 1 d . . . 
O11 O 0.0663(2) 0.34448(12) 0.79298(10) 0.0291(4) Uani 1 1 d . . . 
O12 O -0.0210(3) 0.25243(13) 0.86570(12) 0.0421(6) Uani 1 1 d . . . 
C17 C 0.3245(3) 0.44387(16) 0.90122(13) 0.0234(5) Uani 1 1 d . . . 
C18 C 0.3032(3) 0.47846(17) 0.96780(14) 0.0268(5) Uani 1 1 d . . . 
H18 H 0.3533 0.4588 1.0067 0.032 Uiso 1 1 calc R . . 
C19 C 0.2046(3) 0.54342(18) 0.97429(14) 0.0292(6) Uani 1 1 d . . . 
C20 C 0.1311(4) 0.5700(2) 0.91541(16) 0.0362(7) Uani 1 1 d . . . 
H20 H 0.0639 0.6131 0.9190 0.043 Uiso 1 1 calc R . . 
C21 C 0.1584(3) 0.53167(18) 0.85082(15) 0.0298(6) Uani 1 1 d . . . 
C22 C 0.4260(3) 0.37264(17) 0.88517(14) 0.0251(5) Uani 1 1 d . . . 
C23 C 0.1753(3) 0.58464(19) 1.04476(15) 0.0320(6) Uani 1 1 d . . . 
C24 C 0.0810(4) 0.5532(2) 0.78366(16) 0.0357(7) Uani 1 1 d . . . 
N3 N 0.2543(3) 0.47022(14) 0.84464(11) 0.0247(4) Uani 1 1 d . . . 
O13 O 0.4357(2) 0.35125(13) 0.82131(10) 0.0302(4) Uani 1 1 d . . . 
O14 O 0.4904(3) 0.33936(14) 0.93492(10) 0.0362(5) Uani 1 1 d . . . 
O15 O 0.2196(3) 0.55786(16) 1.09903(11) 0.0438(6) Uani 1 1 d . . . 
O16 O 0.0983(3) 0.65182(17) 1.03835(12) 0.0542(8) Uani 1 1 d . . . 
H16O H 0.0752 0.6766 1.0765 0.081 Uiso 1 1 d R . . 
O17 O 0.1166(2) 0.51142(13) 0.72943(10) 0.0329(4) Uani 1 1 d . . . 
O18 O -0.0106(4) 0.6094(2) 0.78655(15) 0.0749(11) Uani 1 1 d . . . 
C25 C 0.1778(3) 0.88717(17) 0.29096(14) 0.0241(5) Uani 1 1 d . . . 
C26 C 0.1772(3) 0.97530(17) 0.29688(15) 0.0273(5) Uani 1 1 d . . . 
H26 H 0.1223 1.0035 0.3301 0.034(9) Uiso 1 1 d R . . 
C27 C 0.2605(3) 1.02010(18) 0.25179(16) 0.0305(6) Uani 1 1 d . . . 
C28 C 0.3402(3) 0.97575(19) 0.20367(16) 0.0328(6) Uani 1 1 d . . . 
H28 H 0.3998 1.0044 0.1740 0.034(9) Uiso 1 1 calc R . . 
C29 C 0.3302(3) 0.88774(19) 0.20015(14) 0.0279(5) Uani 1 1 d . . . 
C30 C 0.0852(3) 0.83703(17) 0.33818(14) 0.0250(5) Uani 1 1 d . . . 
C31 C 0.2674(4) 1.1159(2) 0.25435(19) 0.0388(7) Uani 1 1 d . . . 
C32 C 0.4090(3) 0.8387(2) 0.14524(15) 0.0324(6) Uani 1 1 d . . . 
N4 N 0.2518(3) 0.84310(15) 0.24348(12) 0.0257(5) Uani 1 1 d . . . 
O19 O 0.1022(2) 0.75557(12) 0.33119(11) 0.0318(4) Uani 1 1 d . . . 
H19O H 0.0188 0.7292 0.3507 0.090(17) Uiso 1 1 d R . . 
O20 O 0.0024(3) 0.87165(14) 0.37706(12) 0.0385(5) Uani 1 1 d . . . 
O21 O 0.1710(3) 1.15135(15) 0.29367(14) 0.0475(6) Uani 1 1 d . . . 
H21O H 0.1971 1.2078 0.2871 0.11(2) Uiso 1 1 d R . . 
O22 O 0.3546(3) 1.15299(16) 0.22169(17) 0.0592(7) Uani 1 1 d . . . 
O23 O 0.3519(2) 0.76359(14) 0.12991(12) 0.0356(5) Uani 1 1 d . . . 
H23O H 0.4007 0.7206 0.1030 0.067(14) Uiso 1 1 d R . . 
O24 O 0.5148(3) 0.86831(19) 0.11920(15) 0.0571(7) Uani 1 1 d . . . 
C33 C 0.7335(4) 0.1701(2) 0.51247(17) 0.0385(7) Uani 1 1 d . . . 
H33 H 0.6965 0.2185 0.5345 0.046 Uiso 1 1 calc R . . 
C34 C 0.8311(4) 0.1781(2) 0.46108(19) 0.0453(8) Uani 1 1 d . . . 
H34 H 0.8615 0.2315 0.4478 0.054 Uiso 1 1 calc R . . 
C35 C 0.8828(4) 0.1053(3) 0.42963(19) 0.0496(9) Uani 1 1 d . . . 
H35 H 0.9492 0.1093 0.3945 0.060 Uiso 1 1 calc R . . 
C36 C 0.8373(4) 0.0258(2) 0.44969(18) 0.0437(8) Uani 1 1 d . . . 
H36 H 0.8723 -0.0233 0.4279 0.052 Uiso 1 1 calc R . . 
C37 C 0.7400(3) 0.0201(2) 0.50203(16) 0.0336(6) Uani 1 1 d . . . 
C38 C 0.6827(4) -0.0586(2) 0.53022(16) 0.0359(7) Uani 1 1 d . . . 
C39 C 0.7325(5) -0.1385(2) 0.5093(2) 0.0500(9) Uani 1 1 d . . . 
H39 H 0.8020 -0.1447 0.4755 0.060 Uiso 1 1 calc R . . 
C40 C 0.6747(5) -0.2079(3) 0.5406(2) 0.0597(11) Uani 1 1 d . . . 
H40 H 0.7055 -0.2623 0.5282 0.072 Uiso 1 1 calc R . . 
C41 C 0.5729(5) -0.1974(2) 0.5896(2) 0.0529(10) Uani 1 1 d . . . 
H41 H 0.5338 -0.2440 0.6110 0.063 Uiso 1 1 calc R . . 
C42 C 0.5289(4) -0.1160(2) 0.60681(19) 0.0442(8) Uani 1 1 d . . . 
H42 H 0.4586 -0.1089 0.6400 0.053 Uiso 1 1 calc R . . 
N5 N 0.6914(3) 0.09308(17) 0.53118(13) 0.0324(5) Uani 1 1 d . . . 
H5N H 0.6276 0.0934 0.5689 0.039 Uiso 1 1 d R . . 
N6 N 0.5820(3) -0.04728(18) 0.57835(14) 0.0370(6) Uani 1 1 d . . . 
C43 C -0.0882(4) -0.1936(2) 0.87947(18) 0.0433(8) Uani 1 1 d . . . 
H43 H -0.0200 -0.2001 0.8452 0.052 Uiso 1 1 calc R . . 
C44 C -0.1641(4) -0.2623(2) 0.8997(2) 0.0464(8) Uani 1 1 d . . . 
H44 H -0.1502 -0.3160 0.8789 0.056 Uiso 1 1 calc R . . 
C45 C -0.2630(5) -0.2513(2) 0.9521(2) 0.0506(9) Uani 1 1 d . . . 
H45 H -0.3158 -0.2978 0.9668 0.061 Uiso 1 1 calc R . . 
C46 C -0.2826(4) -0.1713(2) 0.98229(19) 0.0465(8) Uani 1 1 d . . . 
H46 H -0.3475 -0.1638 1.0179 0.056 Uiso 1 1 calc R . . 
C47 C -0.2059(4) -0.1024(2) 0.95958(16) 0.0351(6) Uani 1 1 d . . . 
C48 C -0.2210(4) -0.0128(2) 0.98458(17) 0.0365(7) Uani 1 1 d . . . 
C49 C -0.3139(4) 0.0102(2) 1.0365(2) 0.0475(8) Uani 1 1 d . . . 
H49 H -0.3682 -0.0309 1.0580 0.057 Uiso 1 1 calc R . . 
C50 C -0.3249(5) 0.0955(3) 1.0560(2) 0.0521(9) Uani 1 1 d . . . 
H50 H -0.3878 0.1132 1.0903 0.063 Uiso 1 1 calc R . . 
C51 C -0.2403(5) 0.1535(3) 1.0233(2) 0.0532(10) Uani 1 1 d . . . 
H51 H -0.2445 0.2113 1.0354 0.064 Uiso 1 1 calc R . . 
C52 C -0.1501(5) 0.1251(2) 0.9728(2) 0.0497(9) Uani 1 1 d . . . 
H52 H -0.0936 0.1650 0.9511 0.060 Uiso 1 1 calc R . . 
N7 N -0.1112(3) -0.11706(19) 0.90861(14) 0.0372(6) Uani 1 1 d . . . 
H7N H -0.0573 -0.0734 0.8984 0.045 Uiso 1 1 d R . . 
N8 N -0.1386(3) 0.04353(19) 0.95284(15) 0.0425(7) Uani 1 1 d . . . 
O1W O -0.1828(3) 0.68863(15) 0.69617(17) 0.0556(7) Uani 1 1 d . . . 
H1W H -0.2756 0.6658 0.6973 0.083 Uiso 1 1 d R . . 
H2W H -0.1380 0.6603 0.7316 0.083 Uiso 1 1 d R . . 
O2W O 0.1094(4) 0.6471(2) 0.6350(2) 0.0852(11) Uani 1 1 d . . . 
H3W H 0.0197 0.6696 0.6251 0.128 Uiso 1 1 d R . . 
H4W H 0.0842 0.5952 0.6517 0.128 Uiso 1 1 d R . . 
O3W O 0.4479(4) 0.7271(2) 0.8358(2) 0.0815(10) Uani 1 1 d . . . 
H5W H 0.5073 0.6807 0.8355 0.122 Uiso 1 1 d R . . 
H6W H 0.5039 0.7653 0.8130 0.122 Uiso 1 1 d R . . 
O4W O 0.2187(5) 0.7624(2) 0.7495(3) 0.1088(16) Uani 1 1 d . . . 
H7W H 0.2715 0.7426 0.7869 0.163 Uiso 1 1 d R . . 
H8W H 0.1870 0.7287 0.7160 0.163 Uiso 1 1 d R . . 
O5W O 0.5872(4) 0.5713(2) 0.85226(16) 0.0680(9) Uani 1 1 d . . . 
H9W H 0.5649 0.5413 0.8107 0.102 Uiso 1 1 d R . . 
H10W H 0.6375 0.5322 0.8773 0.102 Uiso 1 1 d R . . 
 
loop_ 
 _atom_site_aniso_label 
 _atom_site_aniso_U_11 
 _atom_site_aniso_U_22 
 _atom_site_aniso_U_33 
 _atom_site_aniso_U_23 
 _atom_site_aniso_U_13 
 _atom_site_aniso_U_12 
K1 0.0512(4) 0.0471(4) 0.0373(4) 0.0006(3) 0.0074(3) 0.0065(3) 
Dy1 0.02684(7) 0.01724(6) 0.01846(6) 0.00137(4) 0.00607(4) 0.00119(4) 
C1 0.0284(13) 0.0217(12) 0.0259(13) 0.0010(10) 0.0046(10) -0.0028(10) 
C2 0.0324(14) 0.0216(12) 0.0327(14) 0.0047(11) 0.0078(11) -0.0055(10) 
C3 0.0338(14) 0.0244(13) 0.0256(13) 0.0072(10) 0.0106(10) 0.0022(11) 
C4 0.0343(14) 0.0277(14) 0.0229(12) 0.0038(10) 0.0026(10) -0.0031(11) 
C5 0.0295(13) 0.0220(12) 0.0212(12) 0.0022(9) 0.0039(10) -0.0046(10) 
C6 0.0336(15) 0.0284(14) 0.0313(14) 0.0033(11) -0.0006(11) -0.0113(11) 
C7 0.0403(16) 0.0262(14) 0.0284(14) 0.0089(11) 0.0132(12) 0.0034(11) 
C8 0.0362(15) 0.0252(13) 0.0249(13) 0.0016(10) 0.0032(11) -0.0085(11) 
N1 0.0270(11) 0.0190(10) 0.0217(10) 0.0018(8) 0.0041(8) -0.0039(8) 
O1 0.0405(12) 0.0373(11) 0.0264(10) 0.0047(8) -0.0031(8) -0.0119(9) 
O2 0.0612(17) 0.0448(14) 0.0559(16) 0.0121(12) -0.0164(13) -0.0316(12) 
O3 0.0580(15) 0.0364(12) 0.0291(11) 0.0095(9) 0.0159(10) -0.0104(10) 
O4 0.0616(16) 0.0517(15) 0.0298(12) 0.0140(10) 0.0029(11) -0.0079(12) 
O5 0.0340(10) 0.0269(10) 0.0265(10) 0.0058(8) 0.0043(8) -0.0105(8) 
O6 0.0670(18) 0.0591(16) 0.0359(13) 0.0088(11) -0.0131(12) -0.0383(14) 
C9 0.0233(12) 0.0210(12) 0.0196(11) 0.0014(9) 0.0066(9) 0.0009(9) 
C10 0.0280(13) 0.0182(12) 0.0258(12) 0.0002(9) 0.0074(10) 0.0028(9) 
C11 0.0255(12) 0.0191(12) 0.0245(12) 0.0023(9) 0.0033(9) -0.0016(9) 
C12 0.0256(12) 0.0222(12) 0.0237(12) 0.0043(10) 0.0083(9) -0.0016(9) 
C13 0.0247(12) 0.0218(12) 0.0186(11) -0.0004(9) 0.0064(9) 0.0038(9) 
C14 0.0252(12) 0.0227(12) 0.0206(11) 0.0005(9) 0.0068(9) 0.0009(9) 
C15 0.0330(14) 0.0193(12) 0.0354(15) 0.0055(11) 0.0053(11) 0.0015(10) 
C16 0.0251(12) 0.0214(12) 0.0248(12) -0.0047(10) 0.0086(10) 0.0004(9) 
N2 0.0261(11) 0.0173(10) 0.0198(10) 0.0017(8) 0.0080(8) 0.0017(8) 
O7 0.0370(11) 0.0209(9) 0.0270(9) 0.0017(7) 0.0166(8) 0.0000(8) 
O8 0.0402(12) 0.0299(11) 0.0388(12) -0.0005(9) 0.0237(9) 0.0047(9) 
O9 0.0660(17) 0.0192(10) 0.0706(17) 0.0006(10) 0.0343(14) 0.0044(10) 
O10 0.0497(14) 0.0281(11) 0.0544(14) 0.0100(10) 0.0225(11) -0.0040(10) 
O11 0.0332(10) 0.0213(9) 0.0340(10) 0.0013(8) 0.0142(8) 0.0043(8) 
O12 0.0584(15) 0.0261(10) 0.0444(13) -0.0008(9) 0.0365(11) 0.0011(10) 
C17 0.0271(13) 0.0209(12) 0.0230(12) 0.0023(9) 0.0047(10) 0.0061(10) 
C18 0.0330(14) 0.0256(13) 0.0221(12) 0.0010(10) 0.0032(10) 0.0067(11) 
C19 0.0365(15) 0.0278(14) 0.0235(13) -0.0033(11) 0.0040(11) 0.0081(11) 
C20 0.0490(18) 0.0305(15) 0.0289(14) -0.0070(12) -0.0005(13) 0.0206(13) 
C21 0.0366(15) 0.0263(13) 0.0263(13) -0.0024(11) -0.0007(11) 0.0106(11) 
C22 0.0286(13) 0.0245(13) 0.0226(12) -0.0003(10) 0.0056(10) 0.0062(10) 
C23 0.0401(16) 0.0289(14) 0.0273(14) -0.0040(11) 0.0082(12) 0.0077(12) 
C24 0.0453(18) 0.0340(16) 0.0277(14) -0.0016(12) -0.0047(12) 0.0186(13) 
N3 0.0308(12) 0.0210(10) 0.0228(10) 0.0002(8) 0.0032(9) 0.0065(9) 
O13 0.0372(11) 0.0323(10) 0.0216(9) -0.0018(8) 0.0035(8) 0.0152(8) 
O14 0.0460(13) 0.0422(12) 0.0221(10) 0.0047(9) 0.0056(8) 0.0214(10) 
O15 0.0631(16) 0.0441(13) 0.0249(11) -0.0019(9) 0.0052(10) 0.0182(12) 
O16 0.088(2) 0.0479(15) 0.0282(11) -0.0066(10) 0.0091(12) 0.0398(15) 
O17 0.0451(12) 0.0306(10) 0.0230(9) -0.0005(8) -0.0012(8) 0.0120(9) 
O18 0.102(3) 0.080(2) 0.0418(15) -0.0147(14) -0.0183(15) 0.070(2) 
C25 0.0247(12) 0.0240(12) 0.0236(12) 0.0013(10) 0.0017(9) -0.0022(10) 
C26 0.0301(14) 0.0236(13) 0.0277(13) -0.0018(10) -0.0004(10) -0.0006(10) 
C27 0.0328(14) 0.0236(13) 0.0349(15) 0.0071(11) -0.0045(11) -0.0053(11) 
C28 0.0332(15) 0.0342(15) 0.0319(15) 0.0111(12) 0.0034(11) -0.0060(12) 
C29 0.0251(13) 0.0332(14) 0.0261(13) 0.0065(11) 0.0036(10) 0.0003(11) 
C30 0.0246(12) 0.0279(13) 0.0224(12) 0.0018(10) 0.0028(9) -0.0029(10) 
C31 0.0415(17) 0.0279(15) 0.0462(18) 0.0068(13) -0.0123(14) -0.0068(13) 
C32 0.0295(14) 0.0434(17) 0.0262(13) 0.0106(12) 0.0095(11) 0.0073(12) 
N4 0.0254(11) 0.0265(11) 0.0259(11) 0.0040(9) 0.0050(9) -0.0003(9) 
O19 0.0333(11) 0.0250(10) 0.0378(11) 0.0008(8) 0.0158(8) -0.0060(8) 
O20 0.0446(13) 0.0346(12) 0.0373(12) -0.0025(9) 0.0200(10) 0.0016(9) 
O21 0.0525(15) 0.0248(11) 0.0641(16) -0.0008(11) -0.0058(12) -0.0044(10) 
O22 0.0683(19) 0.0338(13) 0.077(2) 0.0214(13) 0.0095(15) -0.0105(12) 
O23 0.0348(11) 0.0324(11) 0.0413(12) 0.0029(9) 0.0146(9) 0.0119(9) 
O24 0.0554(17) 0.0642(18) 0.0537(16) 0.0008(13) 0.0342(13) -0.0116(13) 
C33 0.0412(17) 0.0377(17) 0.0358(16) -0.0080(13) 0.0023(13) 0.0020(13) 
C34 0.0464(19) 0.0456(19) 0.0434(19) -0.0014(15) 0.0046(15) -0.0074(15) 
C35 0.0420(19) 0.068(3) 0.0390(18) -0.0065(17) 0.0120(14) -0.0021(17) 
C36 0.0405(18) 0.049(2) 0.0411(18) -0.0130(15) 0.0076(14) 0.0109(15) 
C37 0.0306(14) 0.0391(16) 0.0298(14) -0.0109(12) -0.0035(11) 0.0076(12) 
C38 0.0356(16) 0.0389(17) 0.0320(15) -0.0085(13) -0.0061(12) 0.0071(13) 
C39 0.053(2) 0.045(2) 0.051(2) -0.0125(17) 0.0005(17) 0.0119(16) 
C40 0.070(3) 0.038(2) 0.070(3) -0.0083(19) -0.007(2) 0.0104(19) 
C41 0.063(3) 0.0387(19) 0.056(2) 0.0027(17) -0.0133(19) -0.0051(17) 
C42 0.0408(18) 0.048(2) 0.0432(18) 0.0008(15) -0.0066(14) -0.0031(15) 
N5 0.0306(12) 0.0391(14) 0.0270(12) -0.0068(10) 0.0017(9) 0.0054(10) 
N6 0.0370(14) 0.0389(14) 0.0346(13) -0.0021(11) -0.0033(11) 0.0038(11) 
C43 0.0376(17) 0.055(2) 0.0389(17) 0.0082(15) 0.0082(13) 0.0078(15) 
C44 0.049(2) 0.0431(19) 0.048(2) 0.0068(15) 0.0096(16) 0.0086(15) 
C45 0.058(2) 0.0398(19) 0.056(2) 0.0098(16) 0.0162(18) -0.0037(16) 
C46 0.046(2) 0.049(2) 0.0463(19) 0.0105(16) 0.0195(15) -0.0030(16) 
C47 0.0345(15) 0.0405(17) 0.0311(15) 0.0072(12) 0.0042(12) 0.0006(13) 
C48 0.0355(16) 0.0408(17) 0.0336(15) 0.0098(13) 0.0002(12) -0.0010(13) 
C49 0.050(2) 0.045(2) 0.048(2) 0.0077(16) 0.0128(16) -0.0055(16) 
C50 0.059(2) 0.050(2) 0.048(2) 0.0014(17) 0.0076(17) 0.0042(18) 
C51 0.062(2) 0.041(2) 0.056(2) 0.0082(17) -0.0116(19) 0.0003(17) 
C52 0.056(2) 0.043(2) 0.050(2) 0.0176(16) -0.0046(17) -0.0068(16) 
N7 0.0309(13) 0.0465(16) 0.0352(14) 0.0099(12) 0.0069(10) -0.0025(11) 
N8 0.0414(15) 0.0474(17) 0.0400(15) 0.0171(13) 0.0019(12) -0.0052(12) 
O1W 0.0456(15) 0.0293(12) 0.091(2) 0.0117(13) -0.0208(14) -0.0035(10) 
O2W 0.085(3) 0.073(2) 0.102(3) 0.034(2) 0.013(2) 0.0115(19) 
O3W 0.083(3) 0.058(2) 0.107(3) 0.0221(19) 0.015(2) 0.0045(17) 
O4W 0.113(3) 0.0288(16) 0.183(5) 0.016(2) -0.026(3) -0.0040(18) 
O5W 0.089(2) 0.0577(18) 0.0552(17) -0.0048(14) -0.0195(16) 0.0118(16) 
 
_geom_special_details 
; 
 All esds (except the esd in the dihedral angle between two l.s. planes) 
 are estimated using the full covariance matrix.  The cell esds are taken 
 into account individually in the estimation of esds in distances, angles 
 and torsion angles; correlations between esds in cell parameters are only 
 used when they are defined by crystal symmetry.  An approximate (isotropic) 
 treatment of cell esds is used for estimating esds involving l.s. planes. 
; 
 
loop_ 
 _geom_bond_atom_site_label_1 
 _geom_bond_atom_site_label_2 
 _geom_bond_distance 
 _geom_bond_site_symmetry_2 
 _geom_bond_publ_flag 

K1 O19 2.885(2) . y
K1 O23 2.946(2) . y 
K1 O4 2.949(2) . y 
K1 O15 2.958(2) 1_554 y 
K1 O13 3.025(2) 2_666 y 
K1 O11 3.073(2) 2_566 y 
K1 N4 3.074(2) . y 
K1 O7 3.201(2) 2_666 y 
K1 O12 3.388(3) 2_566 y 
K1 O1 3.432(3) 2_666 y 

Dy1 O1 2.366(2) . y
Dy1 O17 2.392(2) . y 
Dy1 O13 2.397(2) . y 
Dy1 O11 2.397(2) . y 
Dy1 O5 2.440(2) . y 
Dy1 N1 2.481(2) . y 
Dy1 O7 2.4838(19) . y 
Dy1 N3 2.500(2) . y
Dy1 N2 2.523(2) . y 

C1 N1 1.332(3) . ?
C1 C2 1.382(4) . ? 
C1 C6 1.504(4) . ? 
C2 C3 1.383(4) . ? 
C2 H2 0.9300 . ? 
C3 C4 1.379(4) . ? 
C3 C7 1.507(4) . ? 
C4 C5 1.383(4) . ? 
C4 H4 0.9300 . ? 
C5 N1 1.333(3) . ? 
C5 C8 1.508(4) . ? 
C6 O2 1.225(3) . ? 
C6 O1 1.276(4) . ? 
C7 O4 1.197(4) . ? 
C7 O3 1.313(4) . ? 
C8 O6 1.212(4) . ? 
C8 O5 1.290(3) . ? 
O1 K1 3.432(3) 2_666 ? 
O3 H3O 0.8107 . ? 
C9 N2 1.329(3) . ? 
C9 C10 1.383(3) . ? 
C9 C14 1.507(3) . ? 
C10 C11 1.388(4) . ? 
C10 H10 0.9300 . ? 
C11 C12 1.389(4) . ? 
C11 C15 1.498(4) . ? 
C12 C13 1.381(4) . ? 
C12 H12 0.9300 . ? 
C13 N2 1.324(3) . ? 
C13 C16 1.505(3) . ? 
C14 O8 1.224(3) . ? 
C14 O7 1.282(3) . ? 
C15 O10 1.201(4) . ? 
C15 O9 1.301(4) . ? 
C16 O12 1.235(3) . ? 
C16 O11 1.249(3) . ? 
O7 K1 3.201(2) 2_666 ? 
O9 H9O 0.9203 . ? 
O11 K1 3.073(2) 2_566 ? 
O12 K1 3.388(3) 2_566 ? 
C17 N3 1.328(3) . ? 
C17 C18 1.386(4) . ? 
C17 C22 1.502(4) . ? 
C18 C19 1.385(4) . ? 
C18 H18 0.9300 . ? 
C19 C20 1.379(4) . ? 
C19 C23 1.506(4) . ? 
C20 C21 1.385(4) . ? 
C20 H20 0.9300 . ? 
C21 N3 1.327(4) . ? 
C21 C24 1.502(4) . ? 
C22 O14 1.245(3) . ? 
C22 O13 1.261(3) . ? 
C23 O15 1.201(4) . ? 
C23 O16 1.292(4) . ? 
C24 O18 1.235(4) . ? 
C24 O17 1.261(4) . ? 
O13 K1 3.025(2) 2_666 ? 
O15 K1 2.958(2) 1_556 ? 
O16 H16O 0.8491 . ? 
C25 N4 1.335(4) . ? 
C25 C26 1.386(4) . ? 
C25 C30 1.506(4) . ? 
C26 C27 1.385(4) . ? 
C26 H26 0.9300 . ? 
C27 C28 1.374(5) . ? 
C27 C31 1.505(4) . ? 
C28 C29 1.384(4) . ? 
C28 H28 0.9300 . ? 
C29 N4 1.336(3) . ? 
C29 C32 1.495(4) . ? 
C30 O20 1.206(3) . ? 
C30 O19 1.296(3) . ? 
C31 O22 1.196(5) . ? 
C31 O21 1.303(5) . ? 
C32 O24 1.205(4) . ? 
C32 O23 1.298(4) . ? 
O19 H19O 0.9611 . ? 
O21 H21O 0.9312 . ? 
O23 H23O 0.9604 . ? 
C33 N5 1.334(4) . ? 
C33 C34 1.367(5) . ? 
C33 H33 0.9300 . ? 
C34 C35 1.372(5) . ? 
C34 H34 0.9300 . ? 
C35 C36 1.387(6) . ? 
C35 H35 0.9300 . ? 
C36 C37 1.375(5) . ? 
C36 H36 0.9300 . ? 
C37 N5 1.345(4) . ? 
C37 C38 1.470(5) . ? 
C38 N6 1.341(4) . ? 
C38 C39 1.394(5) . ? 
C39 C40 1.379(6) . ? 
C39 H39 0.9300 . ? 
C40 C41 1.359(7) . ? 
C40 H40 0.9300 . ? 
C41 C42 1.381(5) . ? 
C41 H41 0.9300 . ? 
C42 N6 1.326(5) . ? 
C42 H42 0.9300 . ? 
N5 H5N 0.9491 . ? 
C43 N7 1.327(5) . ? 
C43 C44 1.355(5) . ? 
C43 H43 0.9300 . ? 
C44 C45 1.389(5) . ? 
C44 H44 0.9300 . ? 
C45 C46 1.378(5) . ? 
C45 H45 0.9300 . ? 
C46 C47 1.378(5) . ? 
C46 H46 0.9300 . ? 
C47 N7 1.349(4) . ? 
C47 C48 1.477(5) . ? 
C48 N8 1.338(4) . ? 
C48 C49 1.377(5) . ? 
C49 C50 1.383(5) . ? 
C49 H49 0.9300 . ? 
C50 C51 1.377(6) . ? 
C50 H50 0.9300 . ? 
C51 C52 1.364(6) . ? 
C51 H51 0.9300 . ? 
C52 N8 1.329(5) . ? 
C52 H52 0.9300 . ? 
N7 H7N 0.8729 . ? 
O1W H1W 0.9193 . ? 
O1W H2W 0.9198 . ? 
O2W H3W 0.9196 . ? 
O2W H4W 0.9204 . ? 
O3W H5W 0.9199 . ? 
O3W H6W 0.9199 . ? 
O4W H7W 0.9199 . ? 
O4W H8W 0.8502 . ? 
O5W H9W 0.9189 . ? 
O5W H10W 0.9189 . ? 
 
loop_ 
 _geom_angle_atom_site_label_1 
 _geom_angle_atom_site_label_2 
 _geom_angle_atom_site_label_3 
 _geom_angle 
 _geom_angle_site_symmetry_1 
 _geom_angle_site_symmetry_3 
 _geom_angle_publ_flag 

O19 K1 O23 103.29(6) . . ?
O19 K1 O4 71.61(7) . . ? 
O23 K1 O4 159.29(8) . . ? 
O19 K1 O15 138.34(7) . 1_554 ? 
O23 K1 O15 71.44(7) . 1_554 ? 
O4 K1 O15 126.03(8) . 1_554 ? 
O19 K1 O13 136.97(6) . 2_666 ? 
O23 K1 O13 57.00(6) . 2_666 ? 
O4 K1 O13 112.56(7) . 2_666 ? 
O15 K1 O13 76.09(7) 1_554 2_666 ? 
O19 K1 O11 63.18(6) . 2_566 ? 
O23 K1 O11 96.76(6) . 2_566 ? 
O4 K1 O11 98.44(7) . 2_566 ? 
O15 K1 O11 76.20(7) 1_554 2_566 ? 
O13 K1 O11 146.81(6) 2_666 2_566 ? 
O19 K1 N4 52.36(6) . . ? 
O23 K1 N4 52.46(6) . . ? 
O4 K1 N4 115.35(7) . . ? 
O15 K1 N4 117.33(7) 1_554 . ? 
O13 K1 N4 92.59(6) 2_666 . ? 
O11 K1 N4 84.22(6) 2_566 . ? 
O19 K1 O7 88.11(6) . 2_666 ? 
O23 K1 O7 89.93(6) . 2_666 ? 
O4 K1 O7 70.09(6) . 2_666 ? 
O15 K1 O7 132.10(7) 1_554 2_666 ? 
O13 K1 O7 57.25(5) 2_666 2_666 ? 
O11 K1 O7 151.28(6) 2_566 2_666 ? 
N4 K1 O7 77.84(6) . 2_666 ? 
O19 K1 O12 74.37(6) . 2_566 ? 
O23 K1 O12 57.07(6) . 2_566 ? 
O4 K1 O12 135.67(7) . 2_566 ? 
O15 K1 O12 68.38(6) 1_554 2_566 ? 
O13 K1 O12 111.66(6) 2_666 2_566 ? 
O11 K1 O12 39.78(5) 2_566 2_566 ? 
N4 K1 O12 59.41(6) . 2_566 ? 
O7 K1 O12 136.06(6) 2_666 2_566 ? 
O19 K1 O1 130.02(6) . 2_666 ? 
O23 K1 O1 110.62(6) . 2_666 ? 
O4 K1 O1 63.60(7) . 2_666 ? 
O15 K1 O1 87.98(6) 1_554 2_666 ? 
O13 K1 O1 53.81(5) 2_666 2_666 ? 
O11 K1 O1 142.15(6) 2_566 2_666 ? 
N4 K1 O1 133.16(6) . 2_666 ? 
O7 K1 O1 57.19(5) 2_666 2_666 ? 
O12 K1 O1 155.55(5) 2_566 2_666 ? 

O1 Dy1 O17 85.14(8) . . ?
O1 Dy1 O13 76.36(8) . . ? 
O17 Dy1 O13 127.12(7) . . ? 
O1 Dy1 O11 145.16(7) . . ? 
O17 Dy1 O11 77.06(7) . . ? 
O13 Dy1 O11 90.80(7) . . ? 
O1 Dy1 O5 128.61(7) . . ? 
O17 Dy1 O5 83.67(7) . . ? 
O13 Dy1 O5 144.85(7) . . ? 
O11 Dy1 O5 79.26(7) . . ? 
O1 Dy1 N1 65.59(7) . . ? 
O17 Dy1 N1 71.78(7) . . ? 
O13 Dy1 N1 136.19(7) . . ? 
O11 Dy1 N1 132.95(7) . . ? 
O5 Dy1 N1 63.24(7) . . ? 
O1 Dy1 O7 81.95(7) . . ? 
O17 Dy1 O7 150.17(7) . . ? 
O13 Dy1 O7 75.43(7) . . ? 
O11 Dy1 O7 126.49(6) . . ? 
O5 Dy1 O7 83.62(7) . . ? 
N1 Dy1 O7 78.40(7) . . ? 
O1 Dy1 N3 77.94(8) . . ? 
O17 Dy1 N3 64.61(7) . . ? 
O13 Dy1 N3 63.23(7) . . ? 
O11 Dy1 N3 67.42(7) . . ? 
O5 Dy1 N3 137.76(7) . . ? 
N1 Dy1 N3 124.57(7) . . ? 
O7 Dy1 N3 137.12(7) . . ? 
O1 Dy1 N2 136.35(8) . . ? 
O17 Dy1 N2 138.01(8) . . ? 
O13 Dy1 N2 71.10(7) . . ? 
O11 Dy1 N2 64.16(7) . . ? 
O5 Dy1 N2 74.25(7) . . ? 
N1 Dy1 N2 124.54(7) . . ? 
O7 Dy1 N2 62.44(6) . . ? 
N3 Dy1 N2 110.76(7) . . ? 

N1 C1 C2 121.6(2) . . ? 
N1 C1 C6 115.4(2) . . ? 
C2 C1 C6 123.0(2) . . ? 
C1 C2 C3 119.1(2) . . ? 
C1 C2 H2 120.5 . . ? 
C3 C2 H2 120.5 . . ? 
C4 C3 C2 119.2(2) . . ? 
C4 C3 C7 120.9(3) . . ? 
C2 C3 C7 119.8(3) . . ? 
C3 C4 C5 118.3(3) . . ? 
C3 C4 H4 120.9 . . ? 
C5 C4 H4 120.9 . . ? 
N1 C5 C4 122.5(2) . . ? 
N1 C5 C8 114.3(2) . . ? 
C4 C5 C8 123.2(2) . . ? 
O2 C6 O1 126.7(3) . . ? 
O2 C6 C1 117.8(3) . . ? 
O1 C6 C1 115.4(2) . . ? 
O4 C7 O3 125.8(3) . . ? 
O4 C7 C3 123.5(3) . . ? 
O3 C7 C3 110.6(3) . . ? 
O6 C8 O5 126.0(3) . . ? 
O6 C8 C5 120.1(3) . . ? 
O5 C8 C5 113.9(2) . . ? 
C1 N1 C5 119.3(2) . . ? 
C1 N1 Dy1 117.95(17) . . ? 
C5 N1 Dy1 122.48(16) . . ? 
C6 O1 Dy1 123.58(18) . . ? 
C6 O1 K1 120.8(2) . 2_666 ? 
Dy1 O1 K1 95.82(7) . 2_666 ? 
C7 O3 K1 71.95(16) . . ? 
C7 O3 H3O 106.0 . . ? 
C7 O4 K1 129.0(2) . . ? 
C8 O5 Dy1 126.01(16) . . ? 
N2 C9 C10 122.4(2) . . ? 
N2 C9 C14 114.4(2) . . ? 
C10 C9 C14 123.2(2) . . ? 
C9 C10 C11 118.4(2) . . ? 
C9 C10 H10 120.8 . . ? 
C11 C10 H10 120.8 . . ? 
C10 C11 C12 119.2(2) . . ? 
C10 C11 C15 123.4(2) . . ? 
C12 C11 C15 117.4(2) . . ? 
C13 C12 C11 117.9(2) . . ? 
C13 C12 H12 121.1 . . ? 
C11 C12 H12 121.1 . . ? 
N2 C13 C12 123.0(2) . . ? 
N2 C13 C16 114.0(2) . . ? 
C12 C13 C16 123.0(2) . . ? 
O8 C14 O7 125.7(2) . . ? 
O8 C14 C9 119.6(2) . . ? 
O7 C14 C9 114.7(2) . . ? 
O10 C15 O9 124.9(3) . . ? 
O10 C15 C11 122.0(3) . . ? 
O9 C15 C11 113.0(2) . . ? 
O12 C16 O11 126.4(2) . . ? 
O12 C16 C13 116.8(2) . . ? 
O11 C16 C13 116.7(2) . . ? 
C13 N2 C9 119.0(2) . . ? 
C13 N2 Dy1 118.47(16) . . ? 
C9 N2 Dy1 122.43(16) . . ? 
C14 O7 Dy1 125.24(16) . . ? 
C14 O7 K1 107.51(16) . 2_666 ? 
Dy1 O7 K1 99.44(6) . 2_666 ? 
C15 O9 H9O 115.8 . . ? 
C16 O11 Dy1 123.13(17) . . ? 
C16 O11 K1 93.41(16) . 2_566 ? 
Dy1 O11 K1 131.80(8) . 2_566 ? 
C16 O12 K1 79.39(18) . 2_566 ? 
N3 C17 C18 122.7(2) . . ? 
N3 C17 C22 112.9(2) . . ? 
C18 C17 C22 124.3(2) . . ? 
C19 C18 C17 117.6(3) . . ? 
C19 C18 H18 121.2 . . ? 
C17 C18 H18 121.2 . . ? 
C20 C19 C18 119.4(3) . . ? 
C20 C19 C23 119.6(3) . . ? 
C18 C19 C23 121.0(3) . . ? 
C19 C20 C21 119.3(3) . . ? 
C19 C20 H20 120.3 . . ? 
C21 C20 H20 120.3 . . ? 
N3 C21 C20 121.2(3) . . ? 
N3 C21 C24 114.9(2) . . ? 
C20 C21 C24 123.9(3) . . ? 
O14 C22 O13 126.0(2) . . ? 
O14 C22 C17 118.3(2) . . ? 
O13 C22 C17 115.7(2) . . ? 
O15 C23 O16 125.5(3) . . ? 
O15 C23 C19 123.5(3) . . ? 
O16 C23 C19 111.0(3) . . ? 
O18 C24 O17 126.3(3) . . ? 
O18 C24 C21 117.6(3) . . ? 
O17 C24 C21 116.1(3) . . ? 
C21 N3 C17 119.8(2) . . ? 
C21 N3 Dy1 118.78(18) . . ? 
C17 N3 Dy1 120.69(17) . . ? 
C22 O13 Dy1 125.27(17) . . ? 
C22 O13 K1 117.62(18) . 2_666 ? 
Dy1 O13 K1 106.53(7) . 2_666 ? 
C22 O14 K1 66.83(15) . 2_666 ? 
C23 O15 K1 129.2(2) . 1_556 ? 
C23 O16 K1 70.76(17) . 1_556 ? 
C23 O16 H16O 115.3 . . ? 
K1 O16 H16O 47.0 1_556 . ? 
C24 O17 Dy1 124.62(18) . . ? 
N4 C25 C26 123.8(2) . . ? 
N4 C25 C30 117.2(2) . . ? 
C26 C25 C30 119.0(2) . . ? 
C27 C26 C25 118.0(3) . . ? 
C27 C26 H26 121.1 . . ? 
C25 C26 H26 120.9 . . ? 
C28 C27 C26 119.0(3) . . ? 
C28 C27 C31 119.0(3) . . ? 
C26 C27 C31 122.0(3) . . ? 
C27 C28 C29 118.8(3) . . ? 
C27 C28 H28 120.6 . . ? 
C29 C28 H28 120.6 . . ? 
N4 C29 C28 123.3(3) . . ? 
N4 C29 C32 117.3(3) . . ? 
C28 C29 C32 119.5(3) . . ? 
O20 C30 O19 125.1(3) . . ? 
O20 C30 C25 121.4(3) . . ? 
O19 C30 C25 113.5(2) . . ? 
O22 C31 O21 125.5(3) . . ? 
O22 C31 C27 120.6(4) . . ? 
O21 C31 C27 113.9(3) . . ? 
O24 C32 O23 125.3(3) . . ? 
O24 C32 C29 121.5(3) . . ? 
O23 C32 C29 113.2(2) . . ? 
C25 N4 C29 117.1(2) . . ? 
C25 N4 K1 122.79(17) . . ? 
C29 N4 K1 120.00(18) . . ? 
C30 O19 K1 133.86(16) . . ? 
C30 O19 H19O 106.6 . . ? 
K1 O19 H19O 115.7 . . ? 
C31 O21 H21O 97.7 . . ? 
C32 O23 K1 122.53(18) . . ? 
C32 O23 H23O 122.7 . . ? 
K1 O23 H23O 94.5 . . ? 
N5 C33 C34 120.2(3) . . ? 
N5 C33 H33 119.9 . . ? 
C34 C33 H33 119.9 . . ? 
C33 C34 C35 118.2(4) . . ? 
C33 C34 H34 120.9 . . ? 
C35 C34 H34 120.9 . . ? 
C34 C35 C36 120.7(3) . . ? 
C34 C35 H35 119.6 . . ? 
C36 C35 H35 119.6 . . ? 
C37 C36 C35 119.5(3) . . ? 
C37 C36 H36 120.2 . . ? 
C35 C36 H36 120.2 . . ? 
N5 C37 C36 117.8(3) . . ? 
N5 C37 C38 115.7(3) . . ? 
C36 C37 C38 126.5(3) . . ? 
N6 C38 C39 122.9(3) . . ? 
N6 C38 C37 115.0(3) . . ? 
C39 C38 C37 122.0(3) . . ? 
C40 C39 C38 117.3(4) . . ? 
C40 C39 H39 121.3 . . ? 
C38 C39 H39 121.3 . . ? 
C41 C40 C39 120.4(4) . . ? 
C41 C40 H40 119.8 . . ? 
C39 C40 H40 119.8 . . ? 
C40 C41 C42 118.5(4) . . ? 
C40 C41 H41 120.8 . . ? 
C42 C41 H41 120.8 . . ? 
N6 C42 C41 123.3(4) . . ? 
N6 C42 H42 118.4 . . ? 
C41 C42 H42 118.4 . . ? 
C33 N5 C37 123.5(3) . . ? 
C33 N5 H5N 114.6 . . ? 
C37 N5 H5N 121.8 . . ? 
C42 N6 C38 117.6(3) . . ? 
N7 C43 C44 120.0(3) . . ? 
N7 C43 H43 120.0 . . ? 
C44 C43 H43 120.0 . . ? 
C43 C44 C45 118.9(4) . . ? 
C43 C44 H44 120.5 . . ? 
C45 C44 H44 120.5 . . ? 
C46 C45 C44 119.8(3) . . ? 
C46 C45 H45 120.1 . . ? 
C44 C45 H45 120.1 . . ? 
C47 C46 C45 119.9(3) . . ? 
C47 C46 H46 120.0 . . ? 
C45 C46 H46 120.0 . . ? 
N7 C47 C46 117.6(3) . . ? 
N7 C47 C48 116.6(3) . . ? 
C46 C47 C48 125.8(3) . . ? 
N8 C48 C49 123.0(3) . . ? 
N8 C48 C47 115.0(3) . . ? 
C49 C48 C47 122.0(3) . . ? 
C48 C49 C50 118.8(3) . . ? 
C48 C49 H49 120.6 . . ? 
C50 C49 H49 120.6 . . ? 
C51 C50 C49 118.2(4) . . ? 
C51 C50 H50 120.9 . . ? 
C49 C50 H50 120.9 . . ? 
C52 C51 C50 119.2(4) . . ? 
C52 C51 H51 120.4 . . ? 
C50 C51 H51 120.4 . . ? 
N8 C52 C51 123.6(4) . . ? 
N8 C52 H52 118.2 . . ? 
C51 C52 H52 118.2 . . ? 
C43 N7 C47 123.8(3) . . ? 
C43 N7 H7N 120.3 . . ? 
C47 N7 H7N 115.6 . . ? 
C52 N8 C48 117.2(3) . . ? 
H1W O1W H2W 100.0 . . ? 
H3W O2W H4W 102.0 . . ? 
H5W O3W H6W 100.9 . . ? 
H7W O4W H8W 121.1 . . ? 
K1 O5W H9W 46.5 2_666 . ? 
K1 O5W H10W 57.5 2_666 . ? 
H9W O5W H10W 102.3 . . ? 
 
loop_ 
 _geom_torsion_atom_site_label_1 
 _geom_torsion_atom_site_label_2 
 _geom_torsion_atom_site_label_3 
 _geom_torsion_atom_site_label_4 
 _geom_torsion 
 _geom_torsion_site_symmetry_1 
 _geom_torsion_site_symmetry_2 
 _geom_torsion_site_symmetry_3 
 _geom_torsion_site_symmetry_4 
 _geom_torsion_publ_flag 
N1 C1 C2 C3 -0.6(4) . . . . ? 
C6 C1 C2 C3 179.5(3) . . . . ? 
C1 C2 C3 C4 1.6(4) . . . . ? 
C1 C2 C3 C7 -175.5(3) . . . . ? 
C2 C3 C4 C5 -0.9(4) . . . . ? 
C7 C3 C4 C5 176.2(3) . . . . ? 
C3 C4 C5 N1 -1.0(4) . . . . ? 
C3 C4 C5 C8 178.3(3) . . . . ? 
N1 C1 C6 O2 -172.3(3) . . . . ? 
C2 C1 C6 O2 7.6(5) . . . . ? 
N1 C1 C6 O1 6.8(4) . . . . ? 
C2 C1 C6 O1 -173.3(3) . . . . ? 
N1 C1 C6 K1 56.6(3) . . . 2_666 ? 
C2 C1 C6 K1 -123.4(2) . . . 2_666 ? 
C4 C3 C7 O4 -1.1(5) . . . . ? 
C2 C3 C7 O4 176.0(3) . . . . ? 
C4 C3 C7 O3 -179.5(3) . . . . ? 
C2 C3 C7 O3 -2.4(4) . . . . ? 
C4 C3 C7 K1 3.1(7) . . . . ? 
C2 C3 C7 K1 -179.8(4) . . . . ? 
N1 C5 C8 O6 -178.3(3) . . . . ? 
C4 C5 C8 O6 2.4(5) . . . . ? 
N1 C5 C8 O5 2.0(4) . . . . ? 
C4 C5 C8 O5 -177.3(3) . . . . ? 
C2 C1 N1 C5 -1.3(4) . . . . ? 
C6 C1 N1 C5 178.7(3) . . . . ? 
C2 C1 N1 Dy1 -175.4(2) . . . . ? 
C6 C1 N1 Dy1 4.5(3) . . . . ? 
C4 C5 N1 C1 2.1(4) . . . . ? 
C8 C5 N1 C1 -177.2(2) . . . . ? 
C4 C5 N1 Dy1 176.0(2) . . . . ? 
C8 C5 N1 Dy1 -3.4(3) . . . . ? 
O1 Dy1 N1 C1 -8.55(19) . . . . ? 
O17 Dy1 N1 C1 84.4(2) . . . . ? 
O13 Dy1 N1 C1 -40.7(2) . . . . ? 
O11 Dy1 N1 C1 135.45(19) . . . . ? 
O5 Dy1 N1 C1 176.5(2) . . . . ? 
O7 Dy1 N1 C1 -94.9(2) . . . . ? 
N3 Dy1 N1 C1 45.2(2) . . . . ? 
N2 Dy1 N1 C1 -139.27(19) . . . . ? 
O1 Dy1 N1 C5 177.5(2) . . . . ? 
O17 Dy1 N1 C5 -89.5(2) . . . . ? 
O13 Dy1 N1 C5 145.38(19) . . . . ? 
O11 Dy1 N1 C5 -38.5(2) . . . . ? 
O5 Dy1 N1 C5 2.5(2) . . . . ? 
O7 Dy1 N1 C5 91.2(2) . . . . ? 
N3 Dy1 N1 C5 -128.7(2) . . . . ? 
N2 Dy1 N1 C5 46.8(2) . . . . ? 
O2 C6 O1 Dy1 162.9(3) . . . . ? 
C1 C6 O1 Dy1 -16.1(4) . . . . ? 
O2 C6 O1 K1 -74.6(4) . . . 2_666 ? 
C1 C6 O1 K1 106.4(2) . . . 2_666 ? 
O17 Dy1 O1 C6 -58.7(2) . . . . ? 
O13 Dy1 O1 C6 171.2(3) . . . . ? 
O11 Dy1 O1 C6 -117.6(2) . . . . ? 
O5 Dy1 O1 C6 19.2(3) . . . . ? 
N1 Dy1 O1 C6 13.5(2) . . . . ? 
O7 Dy1 O1 C6 94.4(2) . . . . ? 
N3 Dy1 O1 C6 -123.7(3) . . . . ? 
N2 Dy1 O1 C6 128.7(2) . . . . ? 
O17 Dy1 O1 K1 168.00(7) . . . 2_666 ? 
O13 Dy1 O1 K1 37.91(6) . . . 2_666 ? 
O11 Dy1 O1 K1 109.04(12) . . . 2_666 ? 
O5 Dy1 O1 K1 -114.09(8) . . . 2_666 ? 
N1 Dy1 O1 K1 -119.83(8) . . . 2_666 ? 
O7 Dy1 O1 K1 -38.96(6) . . . 2_666 ? 
N3 Dy1 O1 K1 102.94(7) . . . 2_666 ? 
N2 Dy1 O1 K1 -4.59(11) . . . 2_666 ? 
K1 Dy1 O1 K1 157.45(5) 2_566 . . 2_666 ? 
O4 C7 O3 K1 2.5(3) . . . . ? 
C3 C7 O3 K1 -179.1(2) . . . . ? 
O19 K1 O3 C7 88.78(18) . . . . ? 
O23 K1 O3 C7 179.23(17) . . . . ? 
O4 K1 O3 C7 -1.52(18) . . . . ? 
O15 K1 O3 C7 -63.8(2) 1_554 . . . ? 
O13 K1 O3 C7 -130.67(18) 2_666 . . . ? 
O11 K1 O3 C7 52.57(19) 2_566 . . . ? 
N4 K1 O3 C7 136.68(18) . . . . ? 
O7 K1 O3 C7 -154.6(2) 2_666 . . . ? 
C16 K1 O3 C7 77.45(19) 2_566 . . . ? 
O12 K1 O3 C7 98.64(19) 2_566 . . . ? 
O1 K1 O3 C7 -84.14(18) 2_666 . . . ? 
C22 K1 O3 C7 -125.37(18) 2_666 . . . ? 
O3 C7 O4 K1 -4.2(5) . . . . ? 
C3 C7 O4 K1 177.6(2) . . . . ? 
O19 K1 O4 C7 -75.0(3) . . . . ? 
O23 K1 O4 C7 3.7(4) . . . . ? 
O15 K1 O4 C7 147.9(3) 1_554 . . . ? 
O13 K1 O4 C7 59.1(3) 2_666 . . . ? 
O11 K1 O4 C7 -133.0(3) 2_566 . . . ? 
N4 K1 O4 C7 -45.5(3) . . . . ? 
O7 K1 O4 C7 19.7(3) 2_666 . . . ? 
C16 K1 O4 C7 -118.1(3) 2_566 . . . ? 
O12 K1 O4 C7 -116.8(3) 2_566 . . . ? 
O1 K1 O4 C7 82.1(3) 2_666 . . . ? 
C22 K1 O4 C7 73.6(3) 2_666 . . . ? 
O6 C8 O5 Dy1 -179.5(3) . . . . ? 
C5 C8 O5 Dy1 0.2(4) . . . . ? 
O1 Dy1 O5 C8 -7.2(3) . . . . ? 
O17 Dy1 O5 C8 71.4(2) . . . . ? 
O13 Dy1 O5 C8 -134.8(2) . . . . ? 
O11 Dy1 O5 C8 149.4(2) . . . . ? 
N1 Dy1 O5 C8 -1.3(2) . . . . ? 
O7 Dy1 O5 C8 -81.5(2) . . . . ? 
N3 Dy1 O5 C8 111.6(2) . . . . ? 
N2 Dy1 O5 C8 -144.6(2) . . . . ? 
K1 Dy1 O5 C8 -75.3(2) 2_666 . . . ? 
K1 Dy1 O5 C8 130.2(2) 2_566 . . . ? 
N2 C9 C10 C11 -2.9(4) . . . . ? 
C14 C9 C10 C11 177.1(2) . . . . ? 
C9 C10 C11 C12 -0.4(4) . . . . ? 
C9 C10 C11 C15 178.1(3) . . . . ? 
C10 C11 C12 C13 3.2(4) . . . . ? 
C15 C11 C12 C13 -175.4(2) . . . . ? 
C11 C12 C13 N2 -2.9(4) . . . . ? 
C11 C12 C13 C16 174.9(2) . . . . ? 
N2 C9 C14 O8 -174.0(3) . . . . ? 
C10 C9 C14 O8 6.0(4) . . . . ? 
N2 C9 C14 O7 6.7(3) . . . . ? 
C10 C9 C14 O7 -173.3(3) . . . . ? 
C10 C11 C15 O10 -180.0(3) . . . . ? 
C12 C11 C15 O10 -1.5(4) . . . . ? 
C10 C11 C15 O9 -1.0(4) . . . . ? 
C12 C11 C15 O9 177.5(3) . . . . ? 
N2 C13 C16 O12 -171.1(3) . . . . ? 
C12 C13 C16 O12 11.0(4) . . . . ? 
N2 C13 C16 O11 10.2(4) . . . . ? 
C12 C13 C16 O11 -167.8(3) . . . . ? 
C12 C13 N2 C9 -0.3(4) . . . . ? 
C16 C13 N2 C9 -178.2(2) . . . . ? 
C12 C13 N2 Dy1 -177.3(2) . . . . ? 
C16 C13 N2 Dy1 4.7(3) . . . . ? 
C10 C9 N2 C13 3.2(4) . . . . ? 
C14 C9 N2 C13 -176.7(2) . . . . ? 
C10 C9 N2 Dy1 -179.80(19) . . . . ? 
C14 C9 N2 Dy1 0.3(3) . . . . ? 
O1 Dy1 N2 C13 134.09(18) . . . . ? 
O17 Dy1 N2 C13 -34.8(2) . . . . ? 
O13 Dy1 N2 C13 90.14(19) . . . . ? 
O11 Dy1 N2 C13 -10.36(18) . . . . ? 
O5 Dy1 N2 C13 -95.9(2) . . . . ? 
N1 Dy1 N2 C13 -136.21(18) . . . . ? 
O7 Dy1 N2 C13 173.2(2) . . . . ? 
N3 Dy1 N2 C13 39.9(2) . . . . ? 
K1 Dy1 N2 C13 130.48(19) 2_666 . . . ? 
K1 Dy1 N2 C13 -35.41(18) 2_566 . . . ? 
O1 Dy1 N2 C9 -42.9(2) . . . . ? 
O17 Dy1 N2 C9 148.20(18) . . . . ? 
O13 Dy1 N2 C9 -86.8(2) . . . . ? 
O11 Dy1 N2 C9 172.7(2) . . . . ? 
O5 Dy1 N2 C9 87.2(2) . . . . ? 
N1 Dy1 N2 C9 46.8(2) . . . . ? 
O7 Dy1 N2 C9 -3.79(19) . . . . ? 
N3 Dy1 N2 C9 -137.12(19) . . . . ? 
K1 Dy1 N2 C9 -46.49(19) 2_666 . . . ? 
K1 Dy1 N2 C9 147.6(2) 2_566 . . . ? 
O8 C14 O7 Dy1 169.5(2) . . . . ? 
C9 C14 O7 Dy1 -11.2(3) . . . . ? 
K1 C14 O7 Dy1 -115.70(19) 2_666 . . . ? 
O8 C14 O7 K1 -74.8(3) . . . 2_666 ? 
C9 C14 O7 K1 104.5(2) . . . 2_666 ? 
O1 Dy1 O7 C14 162.2(2) . . . . ? 
O17 Dy1 O7 C14 -132.5(2) . . . . ? 
O13 Dy1 O7 C14 84.3(2) . . . . ? 
O11 Dy1 O7 C14 4.4(2) . . . . ? 
O5 Dy1 O7 C14 -67.2(2) . . . . ? 
N1 Dy1 O7 C14 -131.1(2) . . . . ? 
N3 Dy1 O7 C14 99.8(2) . . . . ? 
N2 Dy1 O7 C14 8.3(2) . . . . ? 
K1 Dy1 O7 C14 119.4(2) 2_666 . . . ? 
K1 Dy1 O7 C14 -30.4(2) 2_566 . . . ? 
O1 Dy1 O7 K1 42.84(6) . . . 2_666 ? 
O17 Dy1 O7 K1 108.08(14) . . . 2_666 ? 
O13 Dy1 O7 K1 -35.08(7) . . . 2_666 ? 
O11 Dy1 O7 K1 -115.04(8) . . . 2_666 ? 
O5 Dy1 O7 K1 173.37(6) . . . 2_666 ? 
N1 Dy1 O7 K1 109.45(7) . . . 2_666 ? 
N3 Dy1 O7 K1 -19.62(12) . . . 2_666 ? 
N2 Dy1 O7 K1 -111.09(8) . . . 2_666 ? 
K1 Dy1 O7 K1 -149.77(3) 2_566 . . 2_666 ? 
O12 C16 O11 Dy1 159.6(2) . . . . ? 
C13 C16 O11 Dy1 -21.8(3) . . . . ? 
K1 C16 O11 Dy1 -146.74(18) 2_566 . . . ? 
O12 C16 O11 K1 -53.7(3) . . . 2_566 ? 
C13 C16 O11 K1 124.9(2) . . . 2_566 ? 
O1 Dy1 O11 C16 -118.0(2) . . . . ? 
O17 Dy1 O11 C16 -179.1(2) . . . . ? 
O13 Dy1 O11 C16 -51.1(2) . . . . ? 
O5 Dy1 O11 C16 95.0(2) . . . . ? 
N1 Dy1 O11 C16 131.6(2) . . . . ? 
O7 Dy1 O11 C16 21.3(2) . . . . ? 
N3 Dy1 O11 C16 -111.5(2) . . . . ? 
N2 Dy1 O11 C16 17.4(2) . . . . ? 
K1 Dy1 O11 C16 -39.1(2) 2_666 . . . ? 
K1 Dy1 O11 C16 132.8(3) 2_566 . . . ? 
O1 Dy1 O11 K1 109.26(14) . . . 2_566 ? 
O17 Dy1 O11 K1 48.10(10) . . . 2_566 ? 
O13 Dy1 O11 K1 176.13(10) . . . 2_566 ? 
O5 Dy1 O11 K1 -37.80(10) . . . 2_566 ? 
N1 Dy1 O11 K1 -1.18(15) . . . 2_566 ? 
O7 Dy1 O11 K1 -111.48(10) . . . 2_566 ? 
N3 Dy1 O11 K1 115.71(11) . . . 2_566 ? 
N2 Dy1 O11 K1 -115.38(12) . . . 2_566 ? 
K1 Dy1 O11 K1 -171.89(6) 2_666 . . 2_566 ? 
O11 C16 O12 K1 47.9(3) . . . 2_566 ? 
C13 C16 O12 K1 -130.7(2) . . . 2_566 ? 
N3 C17 C18 C19 -0.3(4) . . . . ? 
C22 C17 C18 C19 -179.3(3) . . . . ? 
C17 C18 C19 C20 0.9(5) . . . . ? 
C17 C18 C19 C23 -179.9(3) . . . . ? 
C18 C19 C20 C21 -0.6(5) . . . . ? 
C23 C19 C20 C21 -179.9(3) . . . . ? 
C19 C20 C21 N3 -0.3(5) . . . . ? 
C19 C20 C21 C24 177.7(3) . . . . ? 
N3 C17 C22 O14 -175.5(3) . . . . ? 
C18 C17 C22 O14 3.7(4) . . . . ? 
N3 C17 C22 O13 3.4(4) . . . . ? 
C18 C17 C22 O13 -177.5(3) . . . . ? 
N3 C17 C22 K1 55.1(3) . . . 2_666 ? 
C18 C17 C22 K1 -125.8(3) . . . 2_666 ? 
C20 C19 C23 O15 169.8(3) . . . . ? 
C18 C19 C23 O15 -9.5(5) . . . . ? 
C20 C19 C23 O16 -10.8(5) . . . . ? 
C18 C19 C23 O16 169.9(3) . . . . ? 
C20 C19 C23 K1 -158.9(4) . . . 1_556 ? 
C18 C19 C23 K1 21.8(7) . . . 1_556 ? 
N3 C21 C24 O18 179.3(4) . . . . ? 
C20 C21 C24 O18 1.2(6) . . . . ? 
N3 C21 C24 O17 -0.7(5) . . . . ? 
C20 C21 C24 O17 -178.8(3) . . . . ? 
C20 C21 N3 C17 0.9(5) . . . . ? 
C24 C21 N3 C17 -177.3(3) . . . . ? 
C20 C21 N3 Dy1 171.3(2) . . . . ? 
C24 C21 N3 Dy1 -6.9(4) . . . . ? 
C18 C17 N3 C21 -0.6(4) . . . . ? 
C22 C17 N3 C21 178.6(3) . . . . ? 
C18 C17 N3 Dy1 -170.8(2) . . . . ? 
C22 C17 N3 Dy1 8.3(3) . . . . ? 
O1 Dy1 N3 C21 98.1(2) . . . . ? 
O17 Dy1 N3 C21 7.8(2) . . . . ? 
O13 Dy1 N3 C21 178.8(2) . . . . ? 
O11 Dy1 N3 C21 -78.1(2) . . . . ? 
O5 Dy1 N3 C21 -37.4(3) . . . . ? 
N1 Dy1 N3 C21 49.5(2) . . . . ? 
O7 Dy1 N3 C21 162.0(2) . . . . ? 
N2 Dy1 N3 C21 -126.6(2) . . . . ? 
K1 Dy1 N3 C21 147.9(2) 2_666 . . . ? 
K1 Dy1 N3 C21 -53.4(2) 2_566 . . . ? 
O1 Dy1 N3 C17 -91.5(2) . . . . ? 
O17 Dy1 N3 C17 178.1(2) . . . . ? 
O13 Dy1 N3 C17 -10.88(19) . . . . ? 
O11 Dy1 N3 C17 92.2(2) . . . . ? 
O5 Dy1 N3 C17 132.90(19) . . . . ? 
N1 Dy1 N3 C17 -140.22(19) . . . . ? 
O7 Dy1 N3 C17 -27.7(3) . . . . ? 
N2 Dy1 N3 C17 43.7(2) . . . . ? 
K1 Dy1 N3 C17 -41.8(2) 2_666 . . . ? 
K1 Dy1 N3 C17 116.9(2) 2_566 . . . ? 
O14 C22 O13 Dy1 163.9(2) . . . . ? 
C17 C22 O13 Dy1 -14.8(3) . . . . ? 
K1 C22 O13 Dy1 -139.8(3) 2_666 . . . ? 
O14 C22 O13 K1 -56.4(4) . . . 2_666 ? 
C17 C22 O13 K1 124.9(2) . . . 2_666 ? 
O1 Dy1 O13 C22 97.0(2) . . . . ? 
O17 Dy1 O13 C22 24.0(3) . . . . ? 
O11 Dy1 O13 C22 -50.3(2) . . . . ? 
O5 Dy1 O13 C22 -122.6(2) . . . . ? 
N1 Dy1 O13 C22 126.9(2) . . . . ? 
O7 Dy1 O13 C22 -177.9(2) . . . . ? 
N3 Dy1 O13 C22 13.8(2) . . . . ? 
N2 Dy1 O13 C22 -112.5(2) . . . . ? 
K1 Dy1 O13 C22 143.3(3) 2_666 . . . ? 
K1 Dy1 O13 C22 -48.3(2) 2_566 . . . ? 
O1 Dy1 O13 K1 -46.33(8) . . . 2_666 ? 
O17 Dy1 O13 K1 -119.30(9) . . . 2_666 ? 
O11 Dy1 O13 K1 166.39(7) . . . 2_666 ? 
O5 Dy1 O13 K1 94.09(13) . . . 2_666 ? 
N1 Dy1 O13 K1 -16.45(13) . . . 2_666 ? 
O7 Dy1 O13 K1 38.74(7) . . . 2_666 ? 
N3 Dy1 O13 K1 -129.54(10) . . . 2_666 ? 
N2 Dy1 O13 K1 104.13(8) . . . 2_666 ? 
K1 Dy1 O13 K1 168.39(4) 2_566 . . 2_666 ? 
O13 C22 O14 K1 36.4(3) . . . 2_666 ? 
C17 C22 O14 K1 -144.9(3) . . . 2_666 ? 
O16 C23 O15 K1 -21.0(5) . . . 1_556 ? 
C19 C23 O15 K1 158.3(2) . . . 1_556 ? 
O15 C23 O16 K1 12.4(3) . . . 1_556 ? 
C19 C23 O16 K1 -167.0(3) . . . 1_556 ? 
O18 C24 O17 Dy1 -171.2(4) . . . . ? 
C21 C24 O17 Dy1 8.8(4) . . . . ? 
O1 Dy1 O17 C24 -87.9(3) . . . . ? 
O13 Dy1 O17 C24 -19.0(3) . . . . ? 
O11 Dy1 O17 C24 62.0(3) . . . . ? 
O5 Dy1 O17 C24 142.4(3) . . . . ? 
N1 Dy1 O17 C24 -153.8(3) . . . . ? 
O7 Dy1 O17 C24 -152.3(2) . . . . ? 
N3 Dy1 O17 C24 -8.9(3) . . . . ? 
N2 Dy1 O17 C24 84.5(3) . . . . ? 
K1 Dy1 O17 C24 -74.5(3) 2_666 . . . ? 
K1 Dy1 O17 C24 85.1(3) 2_566 . . . ? 
O19 K1 C25 N4 -176.2(3) . . . . ? 
O23 K1 C25 N4 -11.6(2) . . . . ? 
O4 K1 C25 N4 149.5(2) . . . . ? 
O15 K1 C25 N4 -53.7(2) 1_554 . . . ? 
O13 K1 C25 N4 31.5(2) 2_666 . . . ? 
O11 K1 C25 N4 -114.4(2) 2_566 . . . ? 
O7 K1 C25 N4 82.4(2) 2_666 . . . ? 
C16 K1 C25 N4 -98.5(2) 2_566 . . . ? 
O12 K1 C25 N4 -74.6(2) 2_566 . . . ? 
O1 K1 C25 N4 86.1(2) 2_666 . . . ? 
C22 K1 C25 N4 14.5(2) 2_666 . . . ? 
O19 K1 C25 C26 172.8(7) . . . . ? 
O23 K1 C25 C26 -22.7(7) . . . . ? 
O4 K1 C25 C26 138.4(7) . . . . ? 
O15 K1 C25 C26 -64.8(7) 1_554 . . . ? 
O13 K1 C25 C26 20.5(7) 2_666 . . . ? 
O11 K1 C25 C26 -125.4(7) 2_566 . . . ? 
N4 K1 C25 C26 -11.0(6) . . . . ? 
O7 K1 C25 C26 71.4(7) 2_666 . . . ? 
C16 K1 C25 C26 -109.5(7) 2_566 . . . ? 
O12 K1 C25 C26 -85.7(7) 2_566 . . . ? 
O1 K1 C25 C26 75.0(7) 2_666 . . . ? 
C22 K1 C25 C26 3.4(7) 2_666 . . . ? 
O19 K1 C25 C30 -1.99(13) . . . . ? 
O23 K1 C25 C30 162.54(16) . . . . ? 
O4 K1 C25 C30 -36.34(15) . . . . ? 
O15 K1 C25 C30 120.46(15) 1_554 . . . ? 
O13 K1 C25 C30 -154.32(14) 2_666 . . . ? 
O11 K1 C25 C30 59.83(14) 2_566 . . . ? 
N4 K1 C25 C30 174.2(3) . . . . ? 
O7 K1 C25 C30 -103.37(15) 2_666 . . . ? 
C16 K1 C25 C30 75.72(15) 2_566 . . . ? 
O12 K1 C25 C30 99.54(15) 2_566 . . . ? 
O1 K1 C25 C30 -99.73(15) 2_666 . . . ? 
C22 K1 C25 C30 -171.36(14) 2_666 . . . ? 
N4 C25 C26 C27 -1.3(4) . . . . ? 
C30 C25 C26 C27 -178.5(3) . . . . ? 
K1 C25 C26 C27 7.3(8) . . . . ? 
C25 C26 C27 C28 -0.3(4) . . . . ? 
C25 C26 C27 C31 -179.8(3) . . . . ? 
C26 C27 C28 C29 2.4(4) . . . . ? 
C31 C27 C28 C29 -178.1(3) . . . . ? 
C27 C28 C29 N4 -3.2(4) . . . . ? 
C27 C28 C29 C32 176.3(3) . . . . ? 
C27 C28 C29 K1 -19.0(10) . . . . ? 
N4 C25 C30 O20 -171.6(3) . . . . ? 
C26 C25 C30 O20 5.8(4) . . . . ? 
K1 C25 C30 O20 -175.8(3) . . . . ? 
N4 C25 C30 O19 7.1(4) . . . . ? 
C26 C25 C30 O19 -175.5(2) . . . . ? 
K1 C25 C30 O19 2.84(19) . . . . ? 
C28 C27 C31 O22 -9.7(5) . . . . ? 
C26 C27 C31 O22 169.8(3) . . . . ? 
C28 C27 C31 O21 169.7(3) . . . . ? 
C26 C27 C31 O21 -10.9(4) . . . . ? 
N4 C29 C32 O24 -156.2(3) . . . . ? 
C28 C29 C32 O24 24.2(5) . . . . ? 
K1 C29 C32 O24 -151.8(3) . . . . ? 
N4 C29 C32 O23 23.7(4) . . . . ? 
C28 C29 C32 O23 -155.9(3) . . . . ? 
C26 C25 N4 C29 0.7(4) . . . . ? 
C30 C25 N4 C29 177.9(2) . . . . ? 
K1 C25 N4 C29 -175.8(3) . . . . ? 
C26 C25 N4 K1 176.4(2) . . . . ? 
C30 C25 N4 K1 -6.4(3) . . . . ? 
C28 C29 N4 C25 1.6(4) . . . . ? 
C32 C29 N4 C25 -177.9(2) . . . . ? 
K1 C29 N4 C25 175.9(3) . . . . ? 
C28 C29 N4 K1 -174.2(2) . . . . ? 
C32 C29 N4 K1 6.3(3) . . . . ? 
O19 K1 N4 C25 2.83(19) . . . . ? 
O23 K1 N4 C25 166.3(2) . . . . ? 
O4 K1 N4 C25 -33.4(2) . . . . ? 
O15 K1 N4 C25 134.4(2) 1_554 . . . ? 
O13 K1 N4 C25 -149.9(2) 2_666 . . . ? 
O11 K1 N4 C25 63.2(2) 2_566 . . . ? 
O7 K1 N4 C25 -94.3(2) 2_666 . . . ? 
C16 K1 N4 C25 73.3(2) 2_566 . . . ? 
O12 K1 N4 C25 96.3(2) 2_566 . . . ? 
O1 K1 N4 C25 -110.1(2) 2_666 . . . ? 
C22 K1 N4 C25 -166.6(2) 2_666 . . . ? 
O19 K1 N4 C29 178.5(2) . . . . ? 
O23 K1 N4 C29 -18.07(19) . . . . ? 
O4 K1 N4 C29 142.2(2) . . . . ? 
O15 K1 N4 C29 -50.0(2) 1_554 . . . ? 
O13 K1 N4 C29 25.7(2) 2_666 . . . ? 
O11 K1 N4 C29 -121.2(2) 2_566 . . . ? 
O7 K1 N4 C29 81.4(2) 2_666 . . . ? 
C16 K1 N4 C29 -111.0(2) 2_566 . . . ? 
O12 K1 N4 C29 -88.1(2) 2_566 . . . ? 
O1 K1 N4 C29 65.5(2) 2_666 . . . ? 
C22 K1 N4 C29 9.0(2) 2_666 . . . ? 
O20 C30 O19 K1 173.4(2) . . . . ? 
C25 C30 O19 K1 -5.3(4) . . . . ? 
O23 K1 O19 C30 -11.7(3) . . . . ? 
O4 K1 O19 C30 147.5(3) . . . . ? 
O15 K1 O19 C30 -88.6(3) 1_554 . . . ? 
O13 K1 O19 C30 43.8(3) 2_666 . . . ? 
O11 K1 O19 C30 -102.6(2) 2_566 . . . ? 
N4 K1 O19 C30 1.8(2) . . . . ? 
O7 K1 O19 C30 77.8(2) 2_666 . . . ? 
C16 K1 O19 C30 -78.2(2) 2_566 . . . ? 
O12 K1 O19 C30 -61.4(2) 2_566 . . . ? 
O1 K1 O19 C30 120.5(2) 2_666 . . . ? 
C22 K1 O19 C30 21.8(3) 2_666 . . . ? 
O24 C32 O23 K1 134.2(3) . . . . ? 
C29 C32 O23 K1 -45.7(3) . . . . ? 
O19 K1 O23 C32 47.3(2) . . . . ? 
O4 K1 O23 C32 -25.8(3) . . . . ? 
O15 K1 O23 C32 -175.8(2) 1_554 . . . ? 
O13 K1 O23 C32 -90.7(2) 2_666 . . . ? 
O11 K1 O23 C32 111.2(2) 2_566 . . . ? 
N4 K1 O23 C32 33.9(2) . . . . ? 
O7 K1 O23 C32 -40.8(2) 2_666 . . . ? 
C16 K1 O23 C32 101.9(2) 2_566 . . . ? 
O12 K1 O23 C32 108.4(2) 2_566 . . . ? 
O1 K1 O23 C32 -95.4(2) 2_666 . . . ? 
C22 K1 O23 C32 -110.7(2) 2_666 . . . ? 
N5 C33 C34 C35 0.3(5) . . . . ? 
C33 C34 C35 C36 -0.1(6) . . . . ? 
C34 C35 C36 C37 -0.5(6) . . . . ? 
C35 C36 C37 N5 0.8(5) . . . . ? 
C35 C36 C37 C38 -179.0(3) . . . . ? 
N5 C37 C38 N6 4.1(4) . . . . ? 
C36 C37 C38 N6 -176.1(3) . . . . ? 
N5 C37 C38 C39 -174.5(3) . . . . ? 
C36 C37 C38 C39 5.3(5) . . . . ? 
N6 C38 C39 C40 -0.5(5) . . . . ? 
C37 C38 C39 C40 178.0(3) . . . . ? 
C38 C39 C40 C41 0.3(6) . . . . ? 
C39 C40 C41 C42 0.2(6) . . . . ? 
C40 C41 C42 N6 -0.6(6) . . . . ? 
C34 C33 N5 C37 0.1(5) . . . . ? 
C36 C37 N5 C33 -0.6(5) . . . . ? 
C38 C37 N5 C33 179.2(3) . . . . ? 
C41 C42 N6 C38 0.4(5) . . . . ? 
C39 C38 N6 C42 0.1(5) . . . . ? 
C37 C38 N6 C42 -178.5(3) . . . . ? 
N7 C43 C44 C45 -1.4(6) . . . . ? 
C43 C44 C45 C46 0.2(6) . . . . ? 
C44 C45 C46 C47 1.1(6) . . . . ? 
C45 C46 C47 N7 -1.2(5) . . . . ? 
C45 C46 C47 C48 176.9(3) . . . . ? 
N7 C47 C48 N8 0.4(4) . . . . ? 
C46 C47 C48 N8 -177.6(3) . . . . ? 
N7 C47 C48 C49 -179.8(3) . . . . ? 
C46 C47 C48 C49 2.1(5) . . . . ? 
N8 C48 C49 C50 1.2(6) . . . . ? 
C47 C48 C49 C50 -178.5(3) . . . . ? 
C48 C49 C50 C51 -1.1(6) . . . . ? 
C49 C50 C51 C52 0.5(6) . . . . ? 
C50 C51 C52 N8 0.0(6) . . . . ? 
C44 C43 N7 C47 1.3(5) . . . . ? 
C46 C47 N7 C43 0.0(5) . . . . ? 
C48 C47 N7 C43 -178.2(3) . . . . ? 
C51 C52 N8 C48 0.1(5) . . . . ? 
C49 C48 N8 C52 -0.7(5) . . . . ? 
C47 C48 N8 C52 179.0(3) . . . . ? 
 
loop_ 
 _geom_hbond_atom_site_label_D 
 _geom_hbond_atom_site_label_H 
 _geom_hbond_atom_site_label_A 
 _geom_hbond_distance_DH 
 _geom_hbond_distance_HA 
 _geom_hbond_distance_DA 
 _geom_hbond_angle_DHA 
 _geom_hbond_site_symmetry_A 
O3 H3O O7     0.81 1.79 2.537(3) 153 2_666 
O9 H9O O4W    0.92 1.60 2.511(4) 169 1_545 
O16 H16O O12  0.85 1.63 2.458(3) 163 2_567 
O19 H19O O5   0.96 1.57 2.502(3) 162 2_566 
O21 H21O O1W  0.93 1.65 2.515(3) 152 2_576 
O23 H23O O14  0.96 1.57 2.514(3) 168 2_666 
N5 H5N O8     0.95 1.96 2.772(3) 142 . 
N7 H7N O10    0.87 2.23 2.882(3) 132 . 
O1W H1W O2    0.92 1.80 2.702(4) 167 1_455 
O1W H2W O18   0.92 1.77 2.672(4) 165 . 
O2W H3W O1W   0.92 2.37 3.044(5) 130 . 
O2W H4W O17   0.92 2.05 2.865(4) 146 . 
O3W H5W O5W   0.92 1.92 2.816(5) 163 . 
O3W H6W O22   0.92 1.97 2.878(4) 171 2_676 
O4W H7W O3W   0.92 1.87 2.709(6) 151 . 
O4W H8W O2W   0.85 2.06 2.909(6) 180 . 
O5W H9W O1    0.92 1.95 2.844(4) 164 . 
O5W H10W O15  0.92 2.01 2.891(4) 161 2_667 
 
_diffrn_measured_fraction_theta_max    0.972 
_diffrn_reflns_theta_full              28.37 
_diffrn_measured_fraction_theta_full   0.972 
_refine_diff_density_max    1.123 
_refine_diff_density_min   -0.738 
_refine_diff_density_rms    0.090 
